# Supplementary material for: Prospective, comparative evaluation of a deep neural network and dermoscopy in the diagnosis of onychomycosis
Source: PLoS One. 2020 Jun 11;15(6):e0234334. doi: 10.1371/journal.pone.0234334 (PMC7289382; doi:10.1371/journal.pone.0234334)
Supplement: S1 Dataset — (PDF) [file pone.0234334.s001.pdf]

(Minimal Data Set)

| Patient number | Sex | Age | Dermoscopy (0-10) | AI (0-100) | Ground truth (Pos=1, Neg=0) | Dermatologist1 | Dermatologist2 | Dermatologist3 | Dermatologist4 | Dermatologist5 | Type | Invasion degree (A<1/4, 1/4≤B<1/2, 1/2≤C<3/4, 3/4≤D) |
|----------------|-----|-----|-------------------|------------|-----------------------------|----------------|----------------|----------------|----------------|----------------|------|------------------------------------------------------|
| 1              | M   | 67  | 5                 | 35.25      | 0                           | 1              | 1              | 1              | 1              | 1              | DSO  | B                                                    |
| 2              | F   | 57  | 1                 | 1.3        | 0                           | 0              | 0              | 0              | 0              | 0              | DSO  | A                                                    |
| 3              | M   | 24  | 4                 | 62.65      | 1                           | 1              | 1              | 1              | 1              | 1              | DSO  | B                                                    |
| 4              | F   | 55  | 3                 | 58.07      | 0                           | 0              | 1              | 1              | 1              | 1              | DSO  | B                                                    |
| 5              | F   | 68  | 5                 | 67.86      | 1                           | 1              | 1              | 1              | 1              | 0              | DSO  | B                                                    |
| 6              | F   | 37  | 3                 | 96.96      | 0                           | 1              | 1              | 1              | 0              | 0              | DSO  | C                                                    |
| 7              | F   | 48  | 5                 | 86.79      | 1                           | 1              | 1              | 1              | 1              | 1              | DSO  | A                                                    |
| 8              | M   | 76  | 3                 | 96.6       | 1                           | 1              | 0              | 1              | 1              | 1              | DSO  | B                                                    |
| 9              | F   | 64  | 3                 | 19.7       | 0                           | 1              | 0              | 1              | 1              | 1              | DSO  | B                                                    |
| 10             | F   | 72  | 5                 | 20.71      | 0                           | 0              | 0              | 0              | 0              | 0              | DSO  | B                                                    |
| 11             | F   | 24  | 2                 | 64.09      | 1                           | 1              | 1              | 1              | 0              | 1              | DSO  | B                                                    |
| 12             | F   | 41  | 5                 | 98.75      | 1                           | 1              | 0              | 1              | 0              | 0              | DSO  | D                                                    |
| 13             | F   | 34  | 3                 | 98.86      | 1                           | 1              | 1              | 1              | 1              | 1              | DSO  | D                                                    |
| 14             | F   | 53  | 5                 | 20.25      | 1                           | 0              | 1              | 1              | 1              | 1              | WSO  | D                                                    |
| 15             | M   | 55  | 4                 | 86.72      | 0                           | 1              | 0              | 1              | 0              | 0              | DSO  | A                                                    |
| 16             | F   | 64  | 3                 | 74.34      | 0                           | 1              | 1              | 1              | 0              | 0              | DSO  | B                                                    |
| 17             | F   | 65  | 5                 | 98.66      | 1                           | 1              | 0              | 1              | 1              | 1              | DSO  | B                                                    |
| 18             | F   | 55  | 3                 | 93.27      | 0                           | 1              | 0              | 0              | 0              | 1              | PSO  | B                                                    |
| 19             | F   | 64  | 3                 | 39.87      | 1                           | 1              | 0              | 1              | 0              | 0              | DSO  | B                                                    |
| 20             | F   | 29  | 5                 | 83.5       | 1                           | 1              | 0              | 0              | 0              | 1              | DSO  | C                                                    |
| 21             | M   | 27  | 3                 | 23.61      | 0                           | 0              | 0              | 0              | 0              | 0              | TSO  | D                                                    |
| 22             | M   | 58  | 5                 | 25.18      | 1                           | 0              | 0              | 0              | 0              | 0              | DSO  | A                                                    |
| 23             | M   | 59  | 5                 | 95.59      | 1                           | 1              | 1              | 1              | 1              | 0              | DSO  | B                                                    |
| 24             | M   | 60  | 4                 | 63.95      | 1                           | 1              | 1              | 1              | 0              | 0              | DSO  | A                                                    |
| 25             | F   | 65  | 5                 | 67.45      | 0                           | 1              | 1              | 1              | 1              | 1              | PSO  | C                                                    |
| 26             | F   | 55  | 2                 | 6.26       | 0                           | 0              | 0              | 0              | 1              | 1              | WSO  | D                                                    |
| 27             | F   | 54  | 5                 | 99.97      | 1                           | 1              | 1              | 1              | 1              | 0              | DSO  | D                                                    |
| 28             | F   | 71  | 3                 | 87.32      | 0                           | 1              | 0              | 1              | 0              | 0              | DSO  | D                                                    |
| 29             | M   | 77  | 3                 | 54.16      | 1                           | 0              | 0              | 0              | 0              | 0              | TSO  | C                                                    |
| 30             | F   | 64  | 6                 | 96.29      | 1                           | 1              | 0              | 0              | 1              | 0              | DSO  | A                                                    |
| 31             | F   | 76  | 3                 | 85.55      | 0                           | 1              | 0              | 0              | 0              | 1              | DSO  | A                                                    |
| 32             | M   | 25  | 6                 | 99.74      | 1                           | 1              | 1              | 0              | 1              | 1              | DSO  | C                                                    |
| 33             | F   | 49  | 7                 | 97.81      | 1                           | 1              | 0              | 0              | 0              | 0              | DSO  | B                                                    |
| 34             | M   | 60  | 2                 | 6.22       | 1                           | 0              | 1              | 1              | 0              | 0              | DSO  | A                                                    |
| 35             | M   | 68  | 4                 | 14.41      | 1                           | 0              | 1              | 1              | 1              | 1              | DSO  | A                                                    |
| 36             | F   | 40  | 2                 | 0.5        | 1                           | 0              | 0              | 1              | 1              | 1              | DSO  | A                                                    |
| 37             | F   | 48  | 2                 | 52.66      | 0                           | 0              | 1              | 0              | 0              | 0              | DSO  | B                                                    |
| 38             | F   | 71  | 2                 | 25.84      | 0                           | 0              | 1              | 0              | 0              | 0              | DSO  | B                                                    |
| 39             | M   | 51  | 5                 | 71.56      | 1                           | 0              | 1              | 1              | 1              | 1              | DSO  | B                                                    |
| 40             | F   | 77  | 3                 | 69.86      | 1                           | 0              | 1              | 1              | 1              | 1              | DSO  | A                                                    |
| 41             | F   | 40  | 5                 | 72.68      | 1                           | 1              | 1              | 1              | 0              | 1              | PSO  | A                                                    |
| 42             | M   | 76  | 5                 | 99.62      | 1                           | 1              | 1              | 1              | 1              | 1              | DSO  | B                                                    |
| 43             | M   | 55  | 4                 | 6.54       | 1                           | 0              | 1              | 1              | 1              | 1              | DSO  | B                                                    |
| 44             | F   | 65  | 3                 | 92.98      | 1                           | 1              | 1              | 1              | 1              | 1              | DSO  | A                                                    |
| 45             | F   | 36  | 5                 | 19.64      | 0                           | 1              | 1              | 0              | 0              | 0              | DSO  | D                                                    |
| 46             | M   | 67  | 5                 | 19.52      | 1                           | 1              | 1              | 1              | 1              | 1              | DSO  | A                                                    |
| 47             | M   | 72  | 4                 | 89.13      | 1                           | 1              | 1              | 0              | 0              | 0              | DSO  | A                                                    |
| 48             | F   | 62  | 2                 | 0.02       | 0                           | 0              | 1              | 1              | 1              | 1              | DSO  | A                                                    |
| 49             | M   | 64  | 4                 | 82.75      | 1                           | 1              | 1              | 1              | 1              | 1              | DSO  | D                                                    |
| 50             | F   | 47  | 3                 | 0.03       | 0                           | 0              | 1              | 1              | 1              | 1              | WSO  | D                                                    |
| 51             | M   | 45  | 3                 | 24.95      | 0                           | 0              | 1              | 0              | 1              | 1              | DSO  | B                                                    |
| 52             | F   | 55  | 5                 | 99.61      | 1                           | 1              | 1              | 1              | 1              | 1              | DSO  | A                                                    |
| 53             | F   | 72  | 6                 | 84.32      | 1                           | 1              | 1              | 0              | 0              | 0              | DSO  | B                                                    |
| 54             | M   | 50  | 7                 | 97.09      | 1                           | 1              | 1              | 0              | 0              | 0              | DSO  | D                                                    |
| 55             | M   | 71  | 3                 | 73.17      | 1                           | 1              | 1              | 0              | 0              | 0              | DSO  | A                                                    |
| 56             | F   | 49  | 6                 | 98.05      | 1                           | 1              | 1              | 1              | 0              | 0              | DSO  | D                                                    |
| 57             | M   | 70  | 0                 | 55.34      | 0                           | 0              | 1              | 0              | 0              | 0              | DSO  | B                                                    |
| 58             | F   | 28  | 1                 | 0          | 0                           | 0              | 1              | 0              | 0              | 0              | DSO  | B                                                    |
| 59             | M   | 25  | 4                 | 90.42      | 1                           | 1              | 1              | 1              | 0              | 1              | DSO  | D                                                    |
| 60             | M   | 60  | 3                 | 33.48      | 1                           | 0              | 1              | 0              | 0              | 0              | DSO  | A                                                    |
| 61             | F   | 60  | 4                 | 98.8       | 1                           | 1              | 1              | 0              | 0              | 1              | DSO  | A                                                    |
| 62             | M   | 59  | 5                 | 35.28      | 0                           | 1              | 1              | 0              | 1              | 0              | DSO  | A                                                    |
| 63             | F   | 45  | 6                 | 99.15      | 1                           | 1              | 1              | 1              | 1              | 1              | DSO  | A                                                    |
| 64             | M   | 61  | 3                 | 0.17       | 0                           | 0              | 1              | 1              | 0              | 0              | DSO  | A                                                    |
| 65             | F   | 52  | 5                 | 68.09      | 1                           | 0              | 1              | 1              | 1              | 0              | DSO  | D                                                    |
| 66             | F   | 57  | 3                 | 99.04      | 0                           | 1              | 1              | 1              | 1              | 1              | DSO  | B                                                    |
| 67             | M   | 65  | 3                 | 66.02      | 1                           | 1              | 1              | 1              | 0              | 1              | DSO  | A                                                    |
| 68             | M   | 38  | 5                 | 54.94      | 1                           | 1              | 1              | 1              | 0              | 0              | PSO  | C                                                    |
| 69             | M   | 50  | 6                 | 53.6       | 1                           | 0              | 1              | 1              | 1              | 1              | DSO  | D                                                    |
| 70             | M   | 26  | 6                 | 80.95      | 1                           | 1              | 1              | 1              | 1              | 1              | DSO  | D                                                    |
| 71             | M   | 64  | 3                 | 95.42      | 1                           | 1              | 1              | 0              | 0              | 0              | DSO  | C                                                    |
| 72             | M   | 57  | 3                 | 5.9        | 0                           | 0              | 1              | 1              | 0              | 1              | DSO  | B                                                    |
| 73             | F   | 32  | 4                 | 10.5       | 0                           | 0              | 1              | 1              | 1              | 1              | DSO  | B                                                    |
| 74             | F   | 53  | 1                 | 6.65       | 1                           | 1              | 1              | 1              | 1              | 0              | DSO  | D                                                    |
| 75             | F   | 52  | 6                 | 42.83      | 0                           | 0              | 1              | 1              | 1              | 1              | DSO  | A                                                    |
| 76             | M   | 61  | 6                 | 70.01      | 1                           | 1              | 1              | 1              | 0              | 0              | DSO  | A                                                    |
| 77             | M   | 68  | 6                 | 90.05      | 1                           | 1              | 1              | 1              | 1              | 1              | DSO  | D                                                    |
| 78             | M   | 65  | 3                 | 78.54      | 1                           | 1              | 1              | 1              | 1              | 1              | DSO  | B                                                    |
| 79             | F   | 61  | 2                 | 0.28       | 0                           | 0              | 1              | 1              | 1              | 1              | DSO  | A                                                    |
| 80             | M   | 48  | 4                 | 94.92      | 1                           | 1              | 0              | 1              | 1              | 1              | DSO  | C                                                    |
| 81             | M   | 44  | 4                 | 50.53      | 1                           | 1              | 1              | 1              | 1              | 1              | DSO  | D                                                    |
| 82             | F   | 66  | 4                 | 21.91      | 1                           | 1              | 1              | 1              | 1              | 1              | DSO  | D                                                    |
| 83             | F   | 50  | 2                 | 65.6       | 0                           | 1              | 1              | 1              | 1              | 1              | DSO  | B                                                    |
| 84             | F   | 75  | 2                 | 15.41      | 1                           | 1              | 0              | 1              | 1              | 1              | DSO  | A                                                    |
| 85             | F   | 81  | 4                 | 1.59       | 0                           | 0              | 0              | 1              | 1              | 0              | TDO  | D                                                    |
| 86             | F   | 59  | 3                 | 47.44      | 0                           | 1              | 1              | 1              | 0              | 0              | DSO  | D                                                    |
| 87             | F   | 49  | 7                 | 98.03      | 1                           | 1              | 1              | 1              | 0              | 0              | DSO  | D                                                    |
| 88             | M   | 66  | 1                 | 33.64      | 0                           | 0              | 1              | 1              | 1              | 1              | DSO  | A                                                    |
| 89             | M   | 45  | 4                 | 46.04      | 1                           | 1              | 1              | 0              | 0              | 0              | DSO  | C                                                    |
| 90             | F   | 52  | 6                 | 88.59      | 1                           | 1              | 1              | 1              | 1              | 1              | DSO  | A                                                    |
